# Supplementary material
Source: PubMed Central journal article supplement (PMC8855460)
Supplement: NIHMS1759059-supplement-1.pdf [file NIHMS1759059-supplement-1.pdf]

1 **Supplemental Materials**

2 **Supplemental Figures**

3 **Supplemental Figure 1**

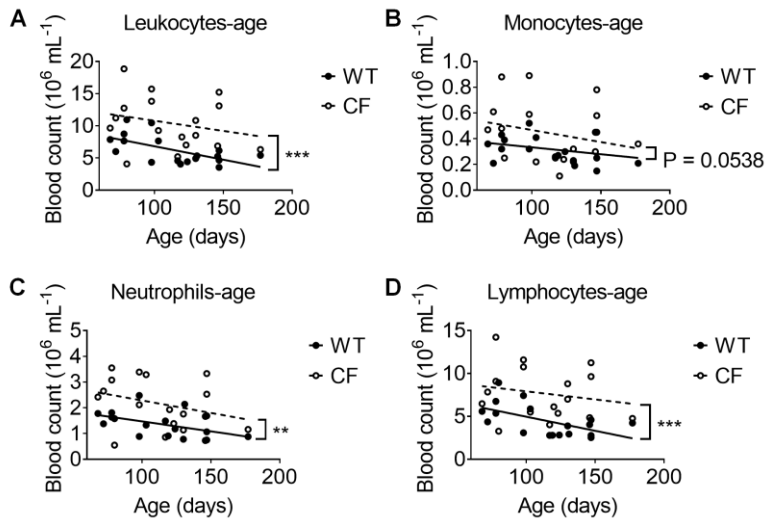

4

5 **SUPPLEMENTAL FIGURE 1. Hematology for total leukocytes (A), monocytes (B),**

6 **neutrophils (C), and lymphocytes (D) in CF mice (n=17) compared to WT controls (n=18) at**

7 **different ages. \*\*p<0.01, \*\*\*p<0.001 by the F-test comparing the elevations or intercepts of WT**

8 **and CF linear regressions.**

9

10 Supplemental Figure 2

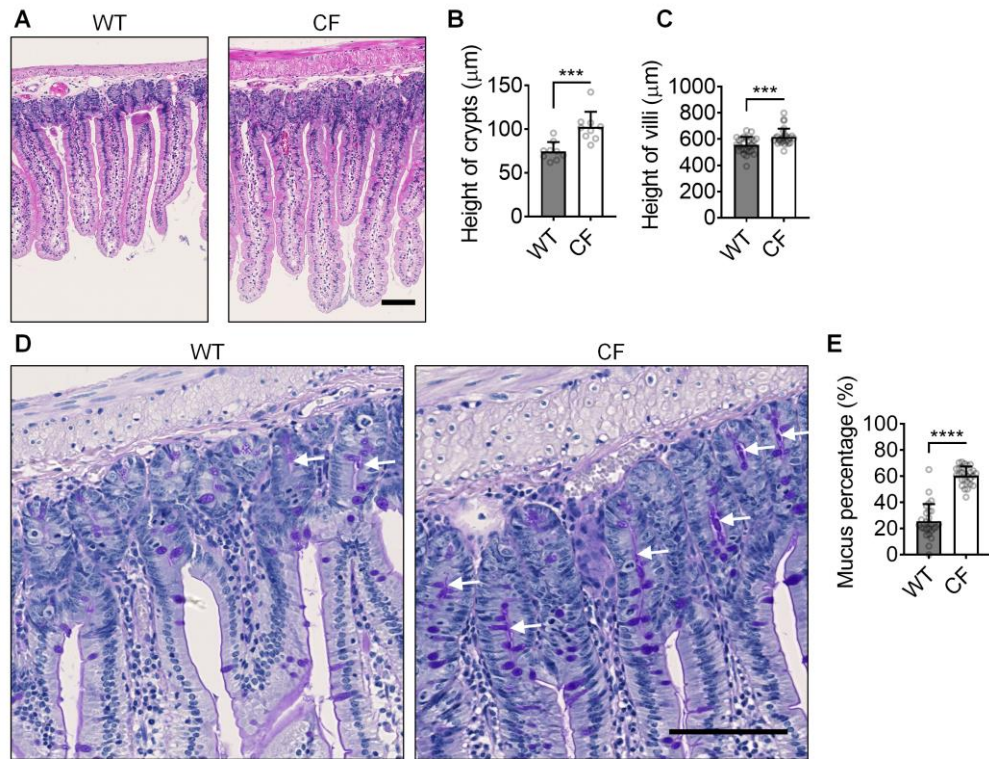

11

12 **SUPPLEMENTAL FIGURE 2.** Intestinal inflammation in  $\text{CFTR}^{\Delta\text{F508}}$  mice. (A) Typical H&E  
13 staining images of intestines from both WT and  $\text{CFTR}^{\Delta\text{F508}}$  mice. (B-C) Crypt (B, Mean $\pm$ SD of  
14  $n=9$ ) and villi (C, Mean $\pm$ SD of  $n=27$ ) height of small intestine from  $\text{CFTR}^{\Delta\text{F508}}$  mice compared to  
15 WT controls. (D) Typical PAS staining images of intestines from both WT and  $\text{CFTR}^{\Delta\text{F508}}$  mice.  
16 White arrows indicate mucus in crypts. (E) Percentage of intestinal crypts that contain mucus in  
17 them. Mean $\pm$ SD of  $n=27$ . \*\*\* $p<0.001$ , \*\*\*\* $p<0.0001$  in the student T-test. Scale bars are 100  
18  $\mu\text{m}$ .

19

20 Supplemental Figure 3

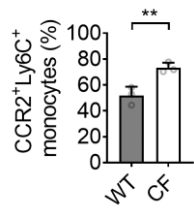

21

22 SUPPLEMENTAL FIGURE 3. Percentage of CCR2<sup>+</sup>Ly6C<sup>+</sup> cells in monocytes purified from

23 WT or CF bone marrow. Mean±SD for n=3 each.

24 **Supplemental Table**

25 **SUPPLEMENTAL TABLE 1.** Reconstitution rate of monocytes after BMT.

|                           | WT to KO (700 rads) | WT to WT (1100 rads) | KO to WT (1100 rads) |
|---------------------------|---------------------|----------------------|----------------------|
| BM                        | 67±2%               | 99.8±0.1%            | 99±1%                |
| Blood                     | 78±15%              | 99.9±0.0%            | 98±2%                |
| Lung                      | 80±13%              | 99.05±0.6%           | 97±3%                |
| Intestinal lamina propria | 60±6%               | 89±1%                | 86±4%                |

26

27
