# Supplementary material
Source: PubMed Central journal article supplement (PMC8855460)
Supplement: NIHMS1759059-supplement-2.pdf [file NIHMS1759059-supplement-2.pdf]

1 **Supplemental Movie 1**

- 2 Representative time-lapse images showing the rolling and arrest of bone marrow monocytes  
3 from wild-type and CFTR $\Delta$ F508 mice on P-selectin/ICAM-1 after CCL2 infusion. Bone marrow  
4 cells were labeled with CD115 and Ly6G to distinguish monocytes and neutrophils, respectively.  
5 Ly6G fluorescence was subtracted from the CD115 fluorescence to remove neutrophils.
